# Supplementary material
Source: publisher figshare collection journal article supplement (https://karger.figshare.com/ndownloader/files/13850570)
Supplement: Supplementary file 1 [file 13850570]

# Supplementary Material

## The Motion of An *Inv* Nodal Cilium: a Realistic Model Revealing Dynein- Driven Ciliary Motion with Microtubule Mislocalization

Yanan Yu<sup>a</sup> Kyosuke Shinohara<sup>b</sup> Huanming Xu<sup>a</sup> Zhenfeng Li<sup>a</sup>  
Tomoki Nishida<sup>c</sup> Hiroshi Hamada<sup>d</sup> Yuanqing Xu<sup>a</sup> Jingqi Zhou<sup>e</sup>  
Daisy Shao<sup>f</sup> Xiangchen Li<sup>g</sup> Duanduan Chen<sup>a</sup>

<sup>a</sup>School of Life Science, Beijing Institute of Technology, Beijing, China, <sup>b</sup>Department of Biotechnology and Life Science, Tokyo University of Agriculture & Technology, Tokyo, <sup>c</sup>Japan Textile Products Quality and Technology Centre, Kobe, <sup>d</sup>Laboratory for Organismal Patterning, RIKEN Centre for Developmental Biology, Kobe, Japan, <sup>e</sup>Chongqing Nankai Secondary School, Chongqing, China, <sup>f</sup>Hyde Park Baptist High School, USA, <sup>g</sup>Beijing the Eighth High School, Beijing, China

**Supplementary Video S1.** The movement of the *inv* cilium.
